# Supplementary material for: Eosinophilic Esophagitis in Children in North-Eastern Poland
Source: MDPI journal article supplement (doi:10.3390/jcm9123869), 2020-11-28
Supplement: s1 [file s1]

**Table S1.** Clinical symptoms in children with EoE based on patient age and sex.

| <b>EoE Group<br/><i>n</i> (%)</b> | <b>&lt;10 Years<br/>(<i>n</i> = 17)</b> | <b>≥10 Years<br/>(<i>n</i> = 19)</b> | <b><i>p</i> Value</b> | <b>Female (<i>n</i> = 8)</b> | <b>Male (<i>n</i> = 28)</b> | <b><i>p</i> Value</b> |
|-----------------------------------|-----------------------------------------|--------------------------------------|-----------------------|------------------------------|-----------------------------|-----------------------|
| Abdominal pain                    | 10 (58.82%)                             | 15 (78.95%)                          | NS                    | 5 (62.50%)                   | 20 (71.43%)                 | NS                    |
| Failure to thrive                 | 6 (35.29%)                              | 5 (26.32%)                           | NS                    | 0 (0.00%)                    | 11 (39.28%)                 | NA                    |
| Dysphagia                         | 3 (17.65%)                              | 5 (26.32%)                           | NS                    | 1 (12.50%)                   | 7 (25.00%)                  | NS                    |
| Halitosis                         | 3 (17.65%)                              | 4 (21.05%)                           | NS                    | 3 (37.50%)                   | 4 (14.29%)                  | NS                    |
| Vomiting                          | 3 (17.65%)                              | 3 (15.78%)                           | NS                    | 2 (25.00%)                   | 4 (14.29%)                  | NS                    |
| Lack of appetite                  | 2 (11.76%)                              | 4 (21.05%)                           | NS                    | 1 (12.50%)                   | 5 (17.86%)                  | NS                    |
| Heartburn                         | 0 (0.00%)                               | 1 (5.26%)                            | NA                    | 0 (0.00%)                    | 1 (3.57%)                   | NA                    |
| Nausea                            | 1 (5.88%)                               | 2 (10.53%)                           | NS                    | 1 (12.50%)                   | 2 (7.14%)                   | NS                    |
| Weight loss                       | 0 (0.00%)                               | 2 (10.53%)                           | NA                    | 0 (0.00%)                    | 2 (7.14%)                   | NA                    |
| Eructation                        | 1 (5.88%)                               | 2 (10.53%)                           | NS                    | 0 (0.00%)                    | 3 (10.71%)                  | NA                    |
| Regurgitation                     | 2 (11.76%)                              | 0 (0.00%)                            | NA                    | 1 (12.50%)                   | 1 (3.57%)                   | NS                    |
| Chest pain                        | 0 (0.00%)                               | 0 (0.00%)                            | NA                    | 0 (0.00%)                    | 0 (0.00%)                   | NA                    |

NA—not applicable; NS—not significant.
